# Supplementary material for: Quantitative interpretation of coal industrial components using a gray system and geophysical logging data: A case study from the Qinshui Basin, China
Source: Frontiers journal article supplement (doi:10.3389/feart.2022.1031218), 2023-01-06
Supplement: Data_Sheet_3.xlsx [file Data_Sheet_3.xlsx]

## Sheet: training data
DEN(g/cm3 )	GR(API)	AC(μs/m)	RD(Ω·m)	CAL(cm)	CNL(V/V)	FCad(%)	predict FCad(%)		Average relative error/%
1.44	31	403.28	3.12	21.765	39.51	82.985	82.985	1.44605e-09	2.02
1.41	28.54	410.09	3.05	21.69	43.1	81.9343	82.471	0.655056
1.35	25.76	411.44	3.13	22.06	47.51	85.6495	84.612	1.21132
1.54	53.95	390.78	2.75	22.165	47.69	75.0238	72.345	3.57065
1.42	26.75	408.13	2.96	22.53	41.24	77.7014	78.568	1.11528
1.39	26.75	408.13	3.16	22.53	41.24	82.4585	81.296	1.40984
1.37	21.99	425.41	3.2	22.285	45.41	79.5062	84.623	6.43569
1.38	21.56	427.46	3.41	23.11	32.39	85.7392	83.874	2.17547
1.5	21.56	427.46	3.41	22.6	32.39	78.4456	81.477	3.86435
1.43	40.75	388.87	3.14	22.38	23.06	80.4827	77.729	3.42145
1.29	31.32	428.58	3.01	22.11	39.6	87.0376	84.301	3.14416
1.47	33.8	423.18	3.5	22.89	49.01	78.6937	79.421	0.924161
1.43	22.59	429.99	3.71	22.89	49.35	80.2246	82.378	2.68422
1.43	19.59	429.99	3.71	22.89	49.35	83.6332	83.637	0.0045802
1.47	34.46	410.48	3.49	22.9	45.63	79.7507	78.679	1.34385
1.53	55.97	478.94	3.01	23.132	32.27	71.6014	72.196	0.830388
1.5	28.21	460.71	3.02	23.729	39.74	74.062	75.116	1.42311
1.42	19.83	477.45	3.36	23.364	40.26	83.9878	81.874	2.51684
1.44	21.7	494.52	3.37	23.326	40.26	83.5164	83.137	0.454256
1.42	18.29	474.99	3.43	22.776	42.45	83.9712	85.416	1.72056
1.58	42.18	463.04	2.92	22.879	45.81	71.044	74.868	5.3826
1.42	22.34	444.85	3.13	22.113	34.86	82.5158	82.562	0.0560302
1.48	29.29	453.5	3.02	22.237	32.72	79.9247	80.976	1.31537
1.35	37.92	493.1	2.77	23.17	39.43	83.8748	81.166	3.22954
1.42	22.57	458	3.36	23.17	25.85	82.049	82.507	0.558185
1.41	28.57	439.83	3.3	23.17	42.84	79.8579	81.174	1.64807
1.5	38.78	408.3	2.92	22.93	41.99	76.2625	74.932	1.74458
1.63	52.23	352.62	2.93	22.214	44.89	67.5428	67.031	0.757773
1.4	32.62	458.05	3.08	22.584	39.07	80.1541	78.568	1.97887
1.43	32.6	421.79	3.16	22.948	45.31	80.6325	78.508	2.63474
1.28	22.08	476.07	3.35	24.336	34.52	86.336	83.868	2.85856
1.4	26.65	488.97	3.34	22.93	52.11	82.9741	84.392	1.70879
1.44	31.46	483.37	2.84	21.841	40.77	82.7623	83.545	0.945708
1.45	28.02	472.22	3.3	21.895	32.71	80.5524	84.352	4.71696
1.75	74.32	362.87	2.37	21.896	33.08	58.8408	61.149	3.92282
1.45	37.6	489.73	3.15	21.9	36.82	81.0258	77.605	4.22191
1.45	37.6	469.73	3.15	21.9	36.82	79.9353	80.672	0.921639
1.4	24.32	442.87	3.17	21.896	33.08	84.422	84.573	0.17881
1.42	15.69	483.89	3.42	22.298	33.54	88.5639	87.61	1.07712
1.46	20.89	472.66	3.13	22.169	35.19	84.0717	85.381	1.55737
1.51	15.13	454.55	3.58	23.051	42.34	83.338	83.064	0.328726
1.42	20.22	459.64	3.6	24.552	48.72	84.482	80.873	4.27188
1.48	19.1	417.41	3.79	23.498	41.41	82.7706	80.374	2.89547
1.4	21.88	434.05	3.74	22.484	41.21	85.8068	84.71	1.27824

## Sheet: testing data
DEN(g/cm3 )	GR(API)	AC(μs/m)	RD(Ω·m)	CAL(cm)	CNL(V/V)	FCad(%)	predict FCad(%)		Average relative error/%	Min. Error/ %	Max. Error/ %
1.48	39.75	408.13	2.86	22.53	41.24	75.2136	74.943	0.359815	1.42	0.01	3.63
1.47	33.8	423.18	3.5	22.89	49.01	77.9088	77.305	0.775067
1.46	21.36	442.13	3.69	22.9	39.53	80.9534	81.621	0.824663
1.43	27.59	429.99	3.71	22.89	49.35	82.6748	81.889	0.950477
1.36	25.56	427.73	2.92	22.659	37.44	85.2785	82.908	2.77975
1.36	18.43	496.99	2.99	22.991	31.02	87.0051	86.219	0.903564
1.48	28.21	460.71	3.02	23.729	39.74	78.5906	78.852	0.332625
1.4	33.12	455.87	3.69	22.512	33.08	82.6754	82.681	0.00680796
1.38	20.22	459.64	3.6	24.552	48.72	83.5918	81.917	2.00356
1.4	24.32	442.87	3.17	21.896	33.08	84.221	84.855	0.752832
1.28	22.61	481.23	3.19	22.992	46.87	88.55	88.051	0.563571
1.32	18.08	476.07	3.35	24.336	34.52	88.6828	85.685	3.38039
1.38	34.77	433.07	3.11	23.127	28.53	83.0337	80.944	2.51664
1.4	28.57	439.83	3.3	23.17	42.84	78.262	81.103	3.63014
1.7	56.96	356.63	2.67	22.451	34.49	65.4423	64.492	1.45216

## Sheet: curve exploration resultsTABLE3
		Average relative error/%	Average relative error/%	Min.	Max.	Parameter
				Error/%	Error/%	columns
	Vdaf	Training set	Test set	Test set	Test set	bN						a	c	d
	DEN	4.68	4.59	0.29	20.78	-17.63						0.29	48.75	57.17
	DEN,GR	3.16	3.02	0.03	11.96	-9.18	-0.21					0.65	72.12	34.82
	DEN,GR,AC	2.78	2.49	0.19	6.59	-23.99	-0.16	0.03				0.58	73.96	44.43
	DEN,GR,AC,RD	2.79	2.53	0.19	6.54	-23.3	-0.17	0.03	-0.5			0.58	75.39	44.14
	DEN,GR,AC,RD,CAL	2.02	1.42	0.01	3.63	-30.62	-0.21	0.04	2.57	-2.47		0.84	150.19	21.25
	DEN,GR,AC,RD,CAL,CNL	2.04	1.43	0.43	3.73	-30.76	-0.21	0.03	2.81	-2.33	-0.04	0.84	148	22.36
